# Supplementary material for: Dendritic cell activation enhances anti-PD-1 mediated immunotherapy against glioblastoma
Source: PubMed Central journal article supplement (PMC5945499; doi:10.18632/oncotarget.25061), 2018-04-17
Supplement: oncotarget-09-20681-s001.pdf [file oncotarget-09-20681-s001.pdf]

## Dendritic cell activation enhances anti-PD-1 mediated immunotherapy against glioblastoma

### SUPPLEMENTARY MATERIALS

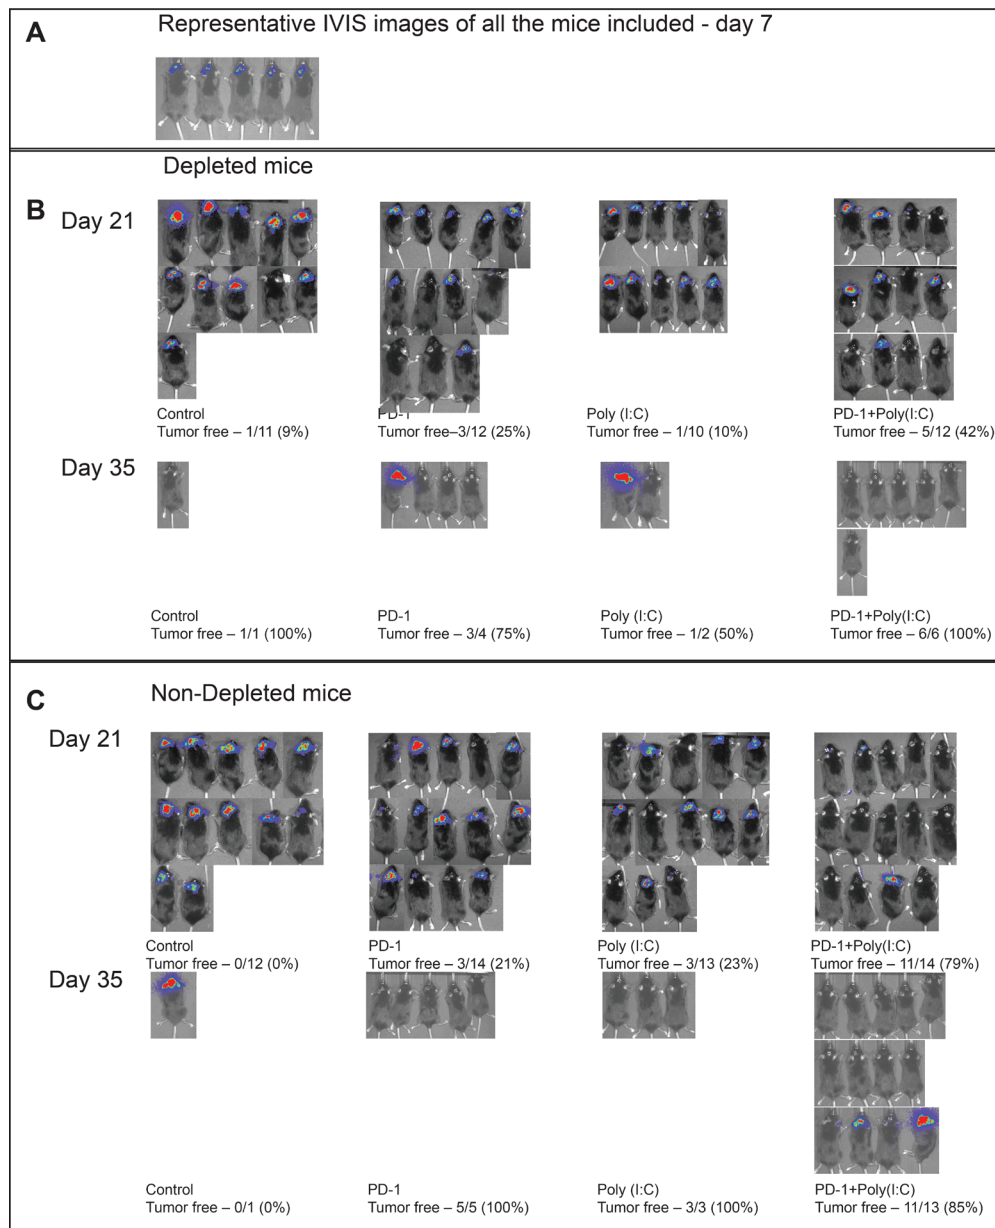

**Supplementary Figure 1: Cross-presenting DC depletion decreases tumor clearance by mice treated with anti-PD-1+Poly(I:C).** (A) Representative bioluminescence images of mice implanted with tumor at day 7. (B) Bioluminescence images of mice in different experimental groups treated with cytochrome c. (C) Bioluminescence images of mice in different experimental groups not treated with cytochrome c.

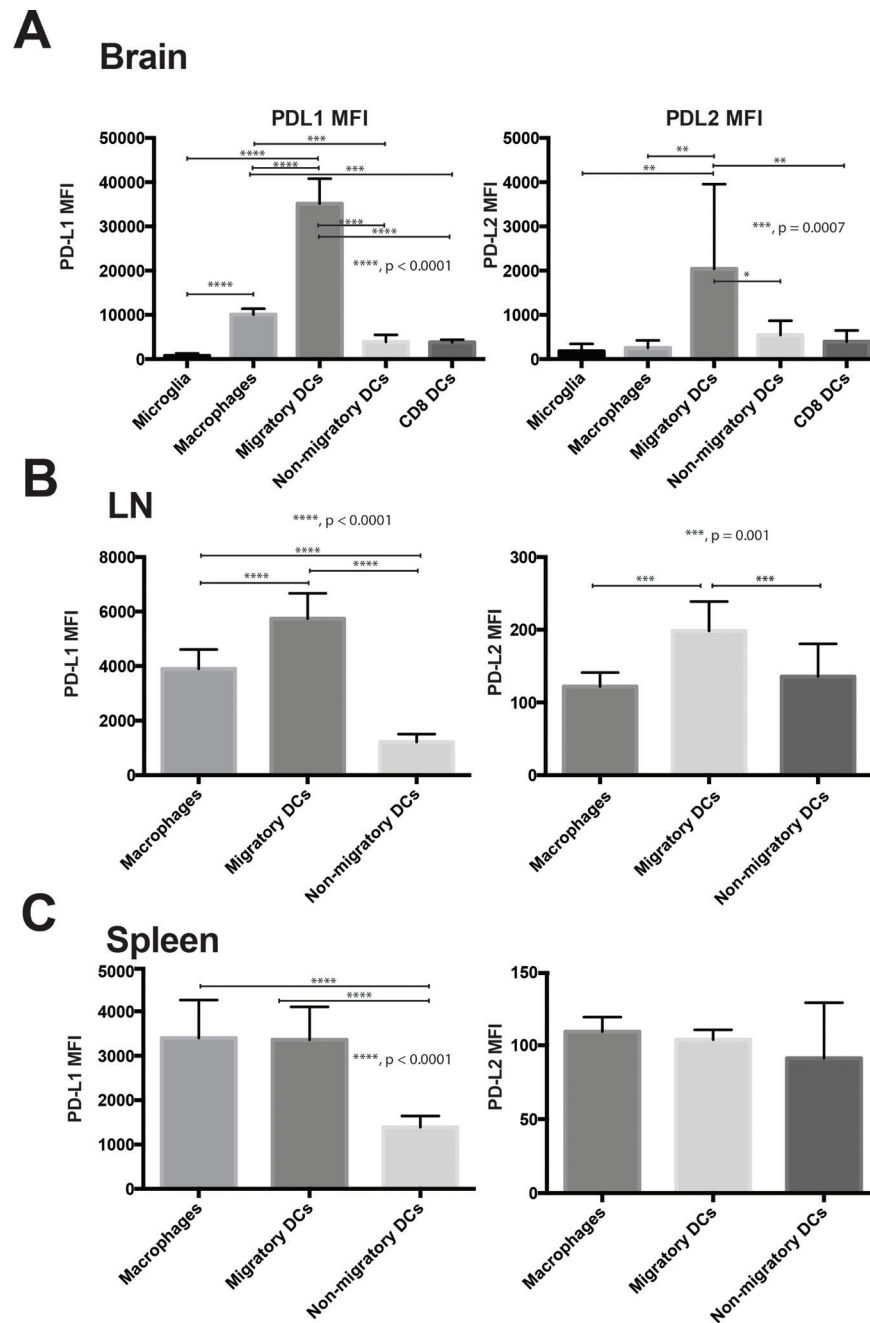

**Supplementary Figure 2: Migratory DCs have the highest expression of PD-L1 and PD-L2 when compared to other myeloid cell populations in the brain tumor and in the lymph node.** (A) MFI values of expression of PD-L1 and PD-L2 in myeloid cells isolated from brain tumors. (B) MFI values of expression of PD-L1 and PD-L2 in myeloid cells isolated from lymph nodes of brain tumor bearing mice. (C) MFI values of expression of PD-L1 and PD-L2 in myeloid cells isolated from spleen of brain tumor bearing mice. Data are represented as mean  $\pm$  SEM. All experiments repeated in triplicate with  $\geq 5$  mice per arm. *P*-values were determined by ANOVA, and, \*denotes statistical significance ( $p < 0.05$ ).

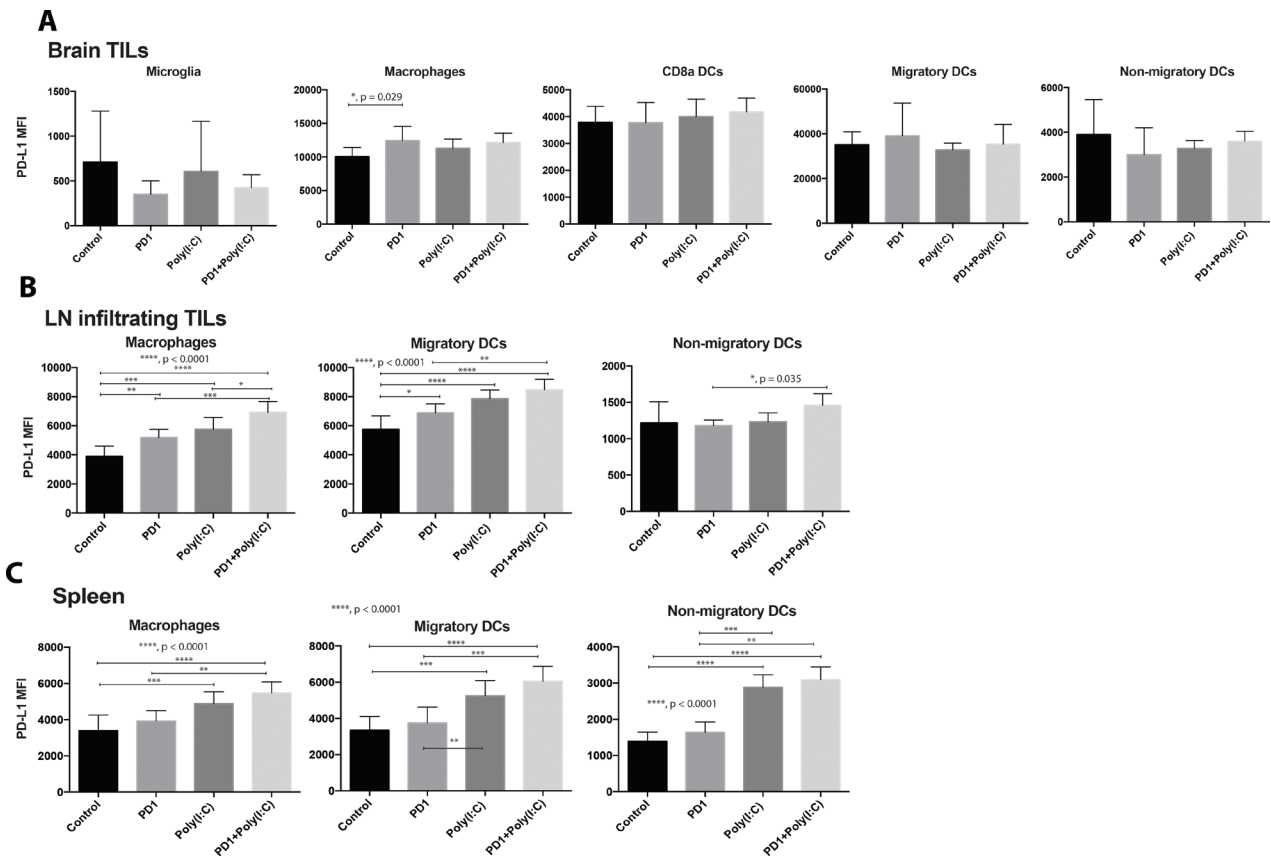

**Supplementary Figure 3: Treatment with anti-PD1+poly(I:C) increases expression of PD-L1 in myeloid cells in the lymph node and in the spleen.** (A) Bar charts of MFI values of expression of PD-L1 in myeloid cells isolated from brain tumors in different treatment groups. (B) Bar charts of MFI values of expression of PD-L1 in myeloid cells isolated from lymph nodes of brain tumor bearing mice in different treatment groups. (C) Bar charts of MFI values of expression of PD-L1 in myeloid cells isolated from spleen of brain tumor bearing mice in different treatment groups. Data are represented as mean  $\pm$  SEM. All experiments repeated in triplicate with  $\geq 5$  mice per arm. *P*-values were determined by ANOVA, and, \*denotes statistical significance ( $p < 0.05$ ).

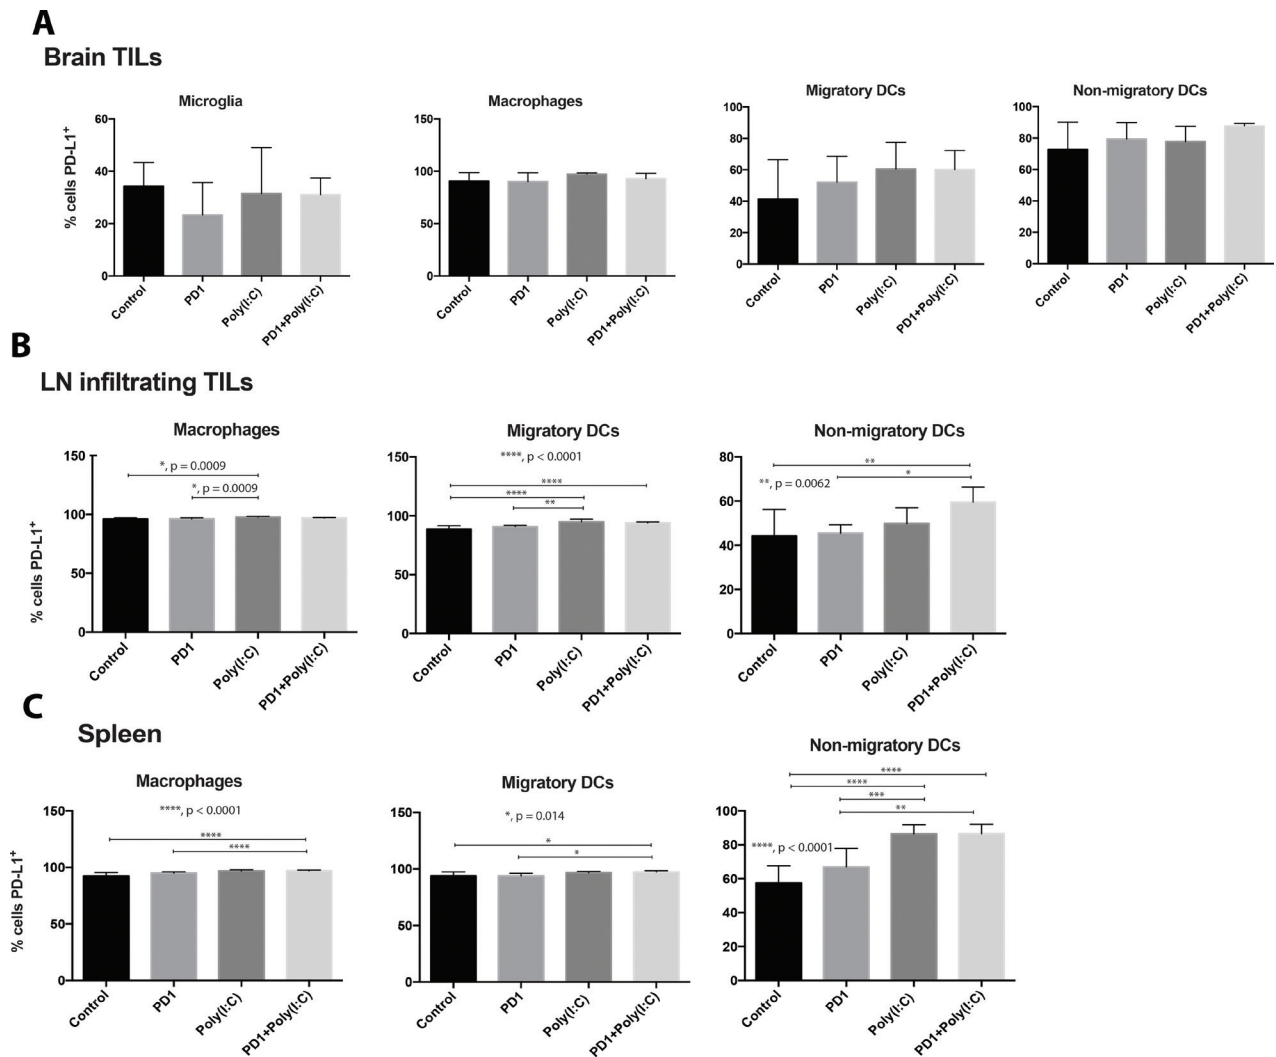

**Supplementary Figure 4: DC activation and anti-PD-1 therapy increases expression of PD-L1 in myeloid cells.** (A) Bar charts summarizing the effect of anti-PD-1, poly(I:C), and combination therapy on expression of PD-L1 of these in brain tumor infiltrating myeloid cells. (B) Bar charts summarizing the effect of anti-PD-1, poly(I:C), and combination therapy on expression of PD-L1 in brain tumor infiltrating myeloid cells in the lymph node. (C) Bar charts summarizing the effect of anti-PD-1, poly(I:C), and combination therapy on expression of PD-L1 in spleen myeloid cells. Data are represented as mean  $\pm$  SEM. All experiments repeated in triplicate with  $\geq 5$  mice per arm. *P*-values were determined by ANOVA, and, \*denotes statistical significance ( $p < 0.05$ ).

**Supplementary Table 1: Antibody list**

| <b>Antibody (flow)</b>     | <b>Clone</b> | <b>Fluorophore</b> | <b>Dilution</b> | <b>Isotype</b>                          | <b>Clone</b> |
|----------------------------|--------------|--------------------|-----------------|-----------------------------------------|--------------|
| F 4/80                     | BM8          | PE/Cy7             | 1:50            |                                         |              |
| CD3                        | 145-2C11     | FITC               | 1:500           |                                         |              |
| CD3                        | 145-2C11     | Pacific Blue       | 1:500           |                                         |              |
| CD4                        | RM4-5        | FITC               | 1:500           |                                         |              |
| CD4                        | RM4-5        | Pacific Blue       | 1:250           |                                         |              |
| F 4/80                     | BM8          | PE/Cy7             | 1:50            |                                         |              |
| CD8                        | 53-6.7       | BV605              | 1:250           |                                         |              |
| FoxP3                      | FJK-16s      | PE                 | 1:200           | Rat IgG2 $\alpha$ $\kappa$              | eBR2a        |
| CD45                       | 104          | AF700              | 1:400           | Rat IgG2 $\beta$ $\kappa$               | RTK4530      |
| CD45                       | 104          | Pacific blue       | 1:400           | Rat IgG2 $\beta$ $\kappa$               | RTK4530      |
| CD11b                      | M1/70        | AF700              | 1:500           | Rat IgG2 $\beta$ $\kappa$               | eB149/10H5   |
| CD11c                      | HL3          | FITC               | 1:500           | Armenian Hamster IgG $_1$ , $\lambda$ 2 | G235-2356    |
| PD-1                       | J43          | PE/Cy7             | 1:200           | Rat IgG2 $\beta$ $\kappa$               | R35-38       |
| TIM-3                      | RMT3-23      | APC                | 1:200           | Rat IgG2 $\alpha$ $\kappa$              | RTK2758      |
| Lag3                       | Ebioc9b7w    | PE                 | 1:100           | Rat IgG1 $\kappa$                       | RTK2071      |
| CD44                       | IM7          | AF700              | 1:250           | Rat IgG2 $\beta$ $\kappa$               | R35-38       |
| CD62L                      | MEL-14       | PerCP/Cy5.5        | 1:500           | Rat IgG2 $\alpha$ $\kappa$              | RTK2758      |
| IFN $\gamma$               | XMG1.2       | Pe/Cy7             | 1:1000          | Rat IgG1 $\kappa$                       | eBRG1        |
| TNF $\alpha$               | MP6-XP22     | FITC               | 1:500           | Rat IgG1 $\kappa$                       | R3-34        |
| PDL1                       | 10F.9G2      | BV421              | 1:200           | Rat IgG2 $\beta$ $\kappa$               | R35-38       |
| PDL2                       | TY25         | PE                 | 1:1000          | Rat IgG2 $\alpha$ $\kappa$              | RTK4530      |
| CX3CR1                     | SA011F11     | APC                | 1:200           | Rat IgG2 $\alpha$ $\kappa$              | RTK2758      |
| I-A/I-E                    | M5/114.15.2  | PerCP/Cy5.5        | 1:400           | Rat IgG2 $\beta$ $\kappa$               | R35-38       |
| <b>Antibody (blocking)</b> | <b>Clone</b> | <b>Dilution</b>    |                 |                                         |              |
| CD16/32                    | 93           | 1:200              |                 |                                         |              |

mAbs were purchased from Biologend, eBioscience, eInvitrogen, Life Technologies, or BD bioscience.
